# Supplementary material
Source: PubMed Central journal article supplement (PMC8761067)
Supplement: EMS129596-supplement-Supplementary_Material.pdf [file EMS129596-supplement-Supplementary_Material.pdf]

1  
2 **1 Online supplement for:**  
3

4  
5 **2**  
6

7 **3 Rapid, simplified whole blood-based multiparameter assay to quantify and phenotype**  
8

9 **4 SARS-CoV-2 specific T cells**  
10  
11

12 **5**  
13

14  
15 **6** Catherine Riou<sup>1,2,\*</sup>, Georgia Schäfer<sup>1,3,4</sup>, Elsa du Bruyn<sup>1,5</sup>, Rene T. Goliath<sup>1</sup>, Cari Stek<sup>1,5,6</sup>, Huihui  
16

17 **7** Mou<sup>7</sup>, Deli Hung<sup>8</sup>, Katalin A. Wilkinson<sup>1,5,9</sup>, Robert J. Wilkinson<sup>1,5,6,9</sup>  
18  
19

20 **8**  
21

22 **9** <sup>1</sup> Wellcome Centre for Infectious Disease Research in Africa and Institute of Infectious Disease  
23 and Molecular Medicine, University of Cape Town, Observatory 7925, South Africa  
24

25 <sup>2</sup> Division of Immunology, Department of Pathology, University of Cape Town, Observatory  
26 7925, South Africa

27 <sup>3</sup> International Centre for Genetic Engineering and Biotechnology (ICGEB) Cape Town,  
28 Observatory 7925, South Africa

29 <sup>4</sup> Division of Medical Biochemistry and Structural Biology, Department of Integrative  
30 Biomedical Sciences, University of Cape Town, Observatory 7925, South Africa

31 <sup>5</sup> Department of Medicine, University of Cape Town, Observatory 7925, South Africa

32 <sup>6</sup> Department of Infectious Diseases, Imperial College London, W12 0NN, UK

33 <sup>7</sup> Department of Immunology and Microbiology, The Scripps Research Institute, Jupiter, FL  
34 33458, USA

35 <sup>8</sup> Department of Immunology and Microbiology, The Scripps Research Institute, La Jolla, CA  
36 92037, USA

37 <sup>9</sup> The Francis Crick Institute, London, NW1 1AT, UK  
38  
39  
40  
41  
42  
43  
44  
45  
46  
47  
48  
49  
50  
51  
52  
53  
54  
55  
56  
57  
58  
59  
60

| Markers                       | Fluorochrome   | Clone     | Company       | Cat. Number | Role                   |
|-------------------------------|----------------|-----------|---------------|-------------|------------------------|
| <b>CD3</b>                    | BV650          | OKT3      | BioLegend     | 317323      | Lineage                |
| <b>CD4</b>                    | BV785          | OKT4      | BioLegend     | 317428      |                        |
| <b>CD8</b>                    | BV510          | RPA-T8    | BioLegend     | 301048      |                        |
| <b>CD45RA</b>                 | Alexa 488      | HI100     | BioLegend     | 304114      | Memory differentiation |
| <b>CD27</b>                   | PE-Cy5         | 1A4CD27   | Beckman       | 6607107     |                        |
| <b>CD38</b>                   | APC            | HIT2      | BD Bioscience | 555462      | Activation             |
| <b>HLA-DR</b>                 | BV605          | L243      | BioLegend     | 307640      |                        |
| <b>Ki67</b>                   | PerCP-Cy5.5    | B56       | BD Bioscience | 561284      |                        |
| <b>PD-1</b>                   | PE             | EH12.2H7  | BioLegend     | 329906      |                        |
| <b>GrB</b>                    | BV421          | GB11      | BD Bioscience | 563388      | Cytotoxic potential    |
| <b>IFN<math>\gamma</math></b> | BV711          | 4S.B3     | BioLegend     | 502540      | Functions              |
| <b>TNF<math>\alpha</math></b> | PE-Cy7         | MAB11     | BioLegend     | 502930      |                        |
| <b>IL-2</b>                   | PE/Dazzle™ 594 | MQ1-17H12 | BioLegend     | 500344      |                        |

**Supp table 1:** Description of the antibody panel used in the study.

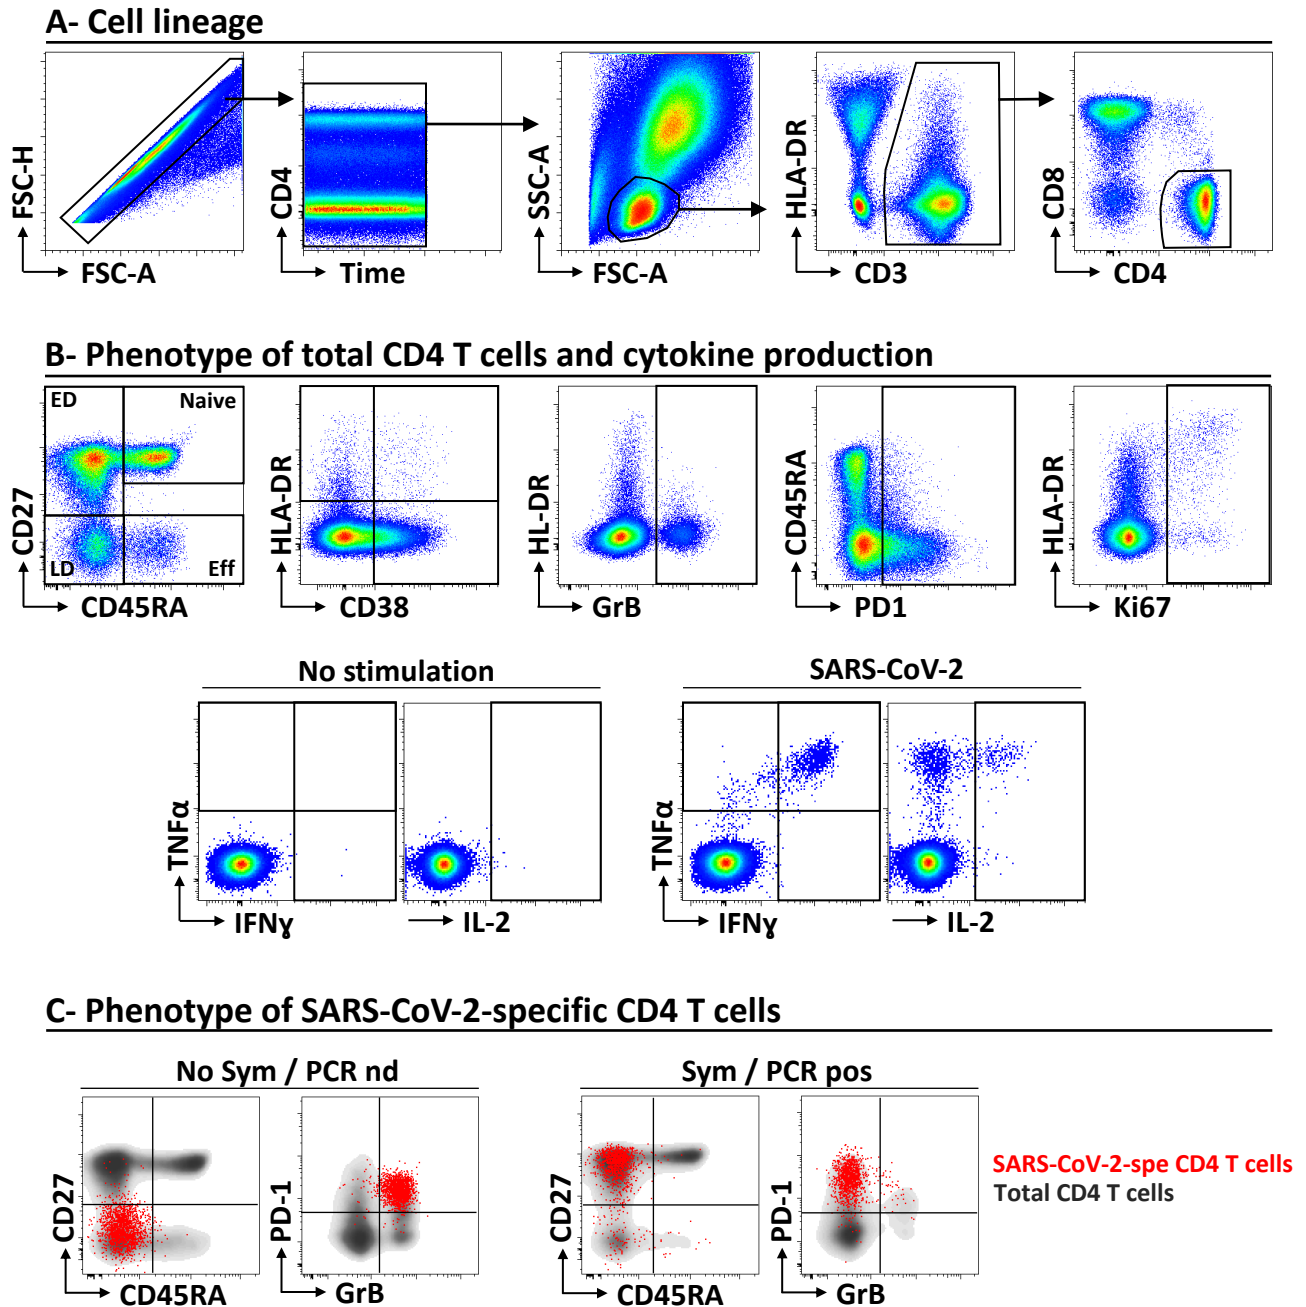

**Supp Figure 1:** Gating strategy used to identify SARS-CoV-2 specific CD4 T cells and defined their phenotypic characteristics. **A-** Cell lineage. **B-** Phenotyping of total CD4 T cell and cytokine production in response to SARS-CoV-2 peptides. **C-** Phenotype of SARS-CoV-2 responding CD4 T cells in one participant with no symptom (left) and one COVID-19 confirmed participant (right). SARS-CoV-2-specific CD4 T cells (expressing any measured cytokine) are depicted in red.

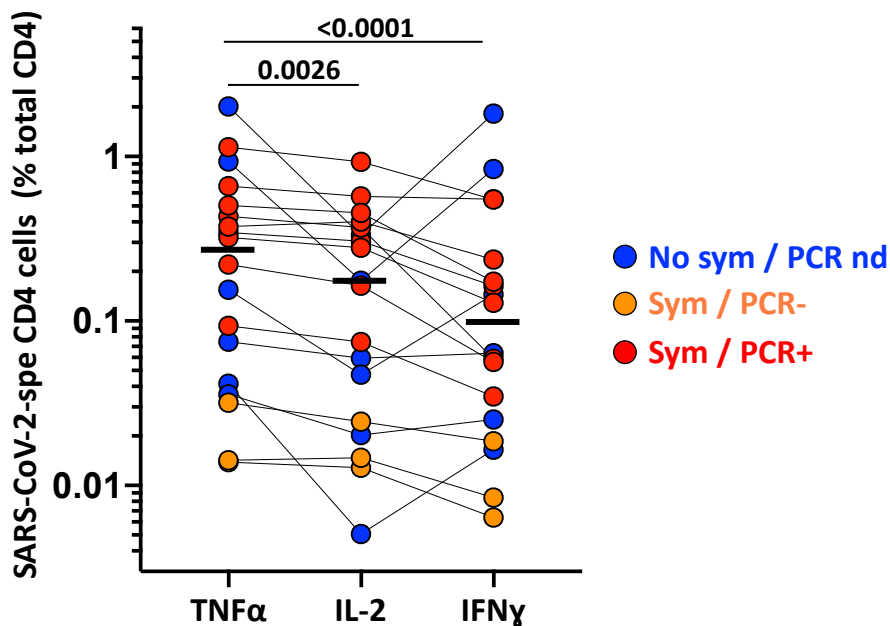

Supp Figure 2: Comparison of magnitude of SARS-CoV-2-specific CD4 T cell response expressing TNF $\alpha$ , IL-2 or IFN $\gamma$  in participants exhibiting a detectable response to SARS-CoV-2 peptide pool. Each dot represent a participant and is color-coded according to clinical characteristics (Blue represents no symptoms, no SARS-CoV-2 PCR performed; Orange: self-reported symptoms, SARS-CoV-2 PCR negative and Red: self-reported symptoms, SARS-CoV-2 PCR positive). Black bars indicate medians. Statistical comparisons were performed using a nonparametric paired Friedman test.
